# Supplementary material
Source: Springer Nature journal article supplement (https://www.springermedizin.de/resource/supplementary/12889_2008_1491_MOESM17_ESM.pdf/9504408)

### Overweight

### Obese

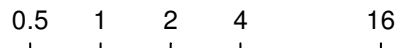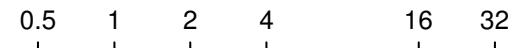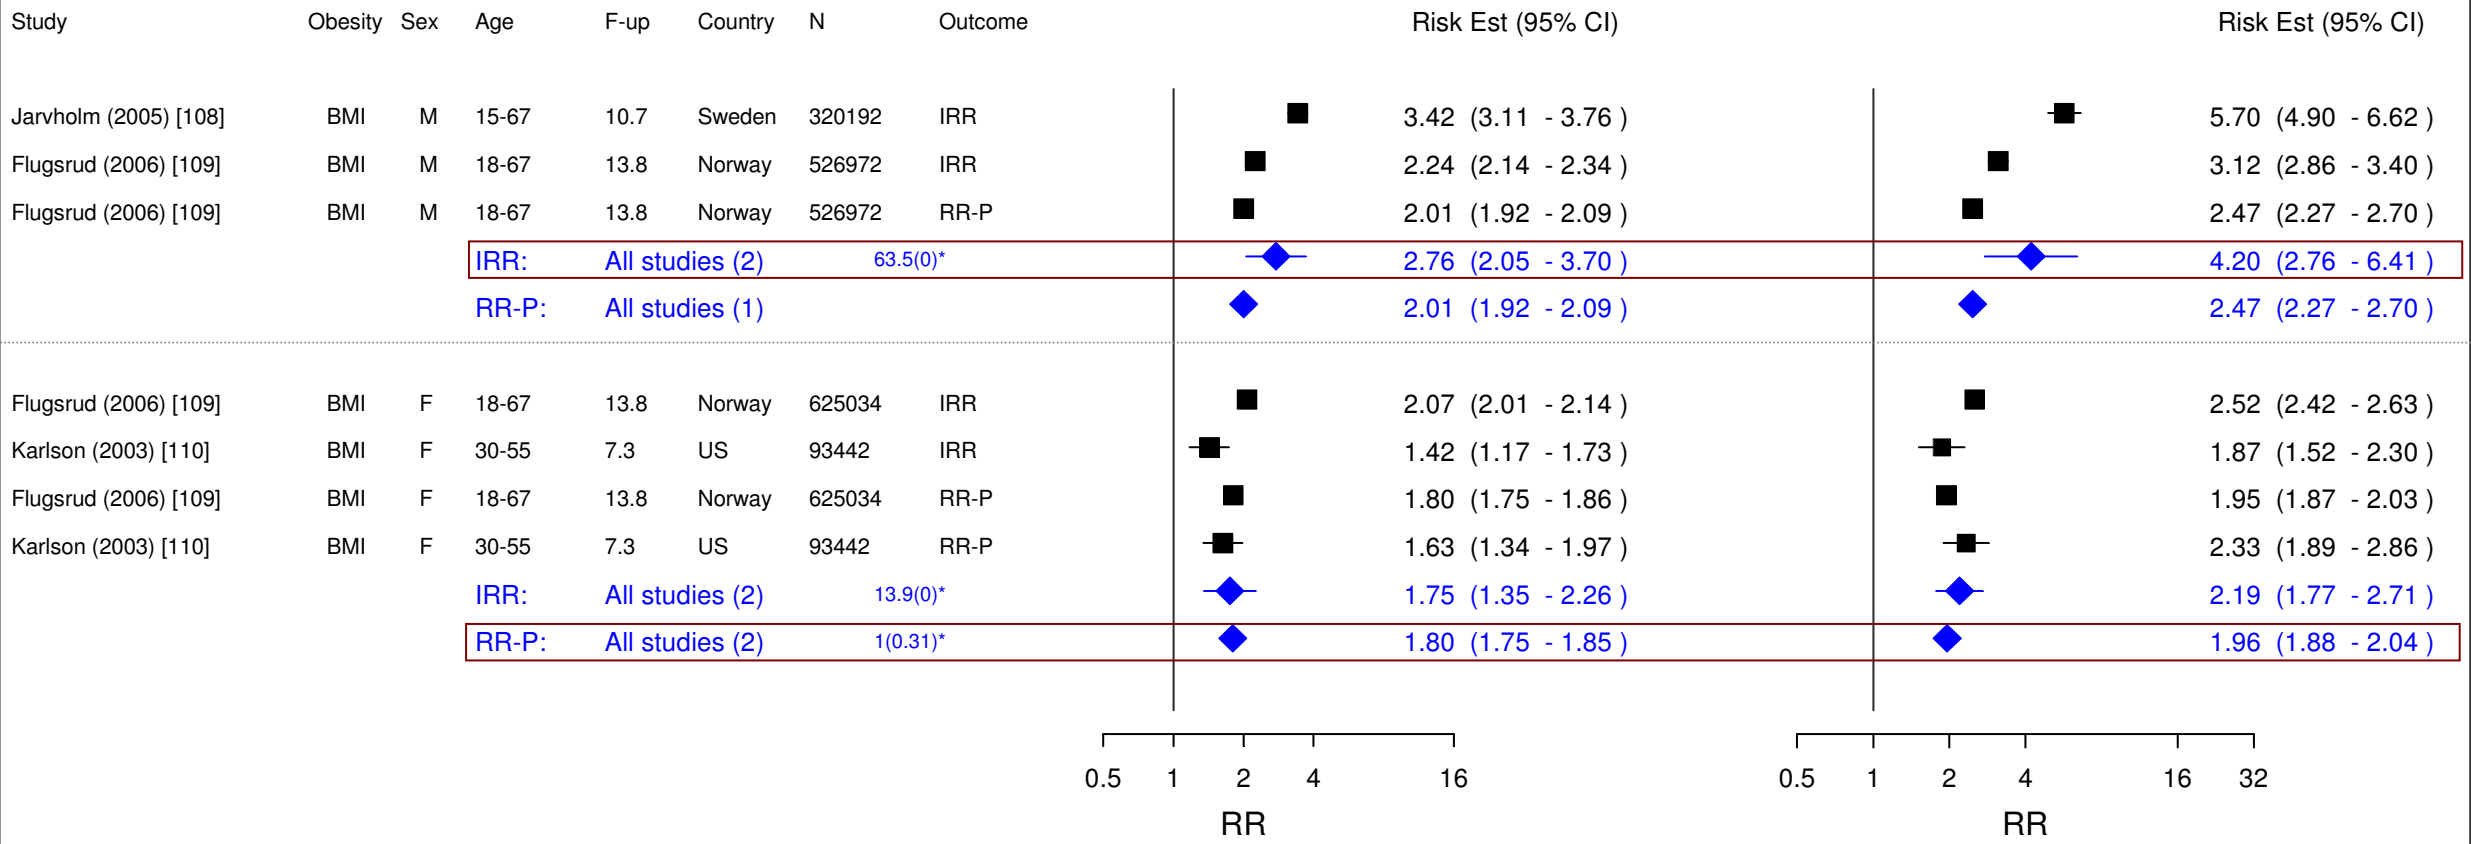

Supplement: MOESM17 [file 9504408]
